# Supplementary material for: Development of LCEs with 100% Azobenzene Moieties: Thermo-Mechanical Phenomena and Behaviors
Source: MDPI journal article supplement (doi:10.3390/mi13101665), 2022-10-03
Supplement: s1 [file s1]

# Supplementary Materials: Development of LCEs with 100% Azobenzene Moieties: Thermo-Mechanical Phenomena and Behaviors

Domenico Sagnelli <sup>\*,†</sup>, Massimo Rippa <sup>†</sup>, Amalia D'Avino, Ambra Vestri, Valentina Marchesano and Lucia Petti

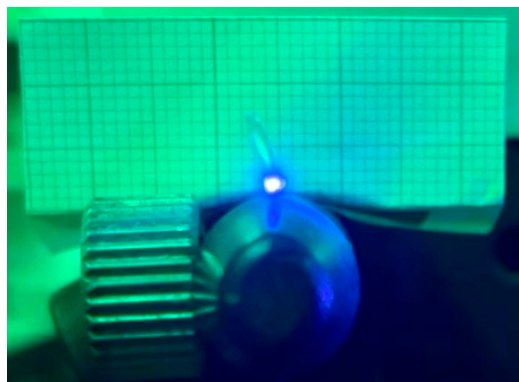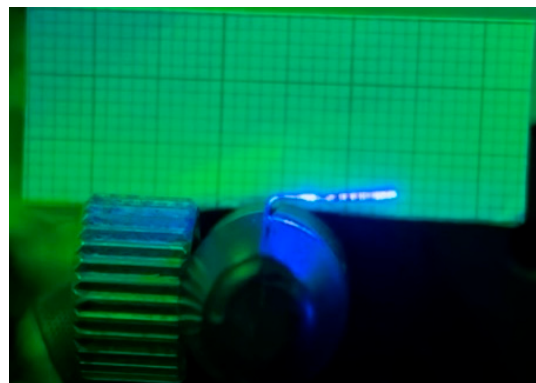

**Figure S1.** (Left) PMP polymerized in cells with 1% elvamide. (Right) PMP polymerized in cells with 6% elvamide.

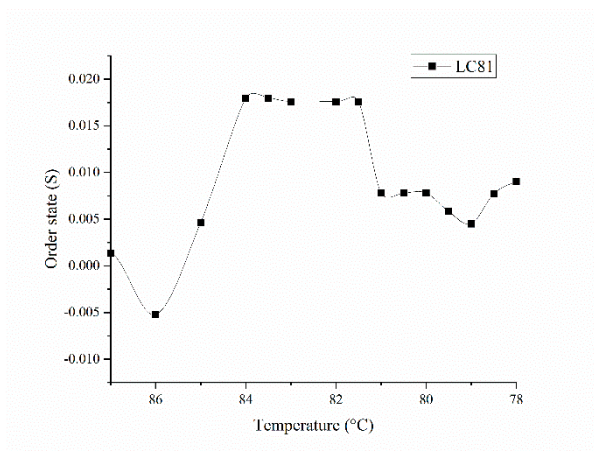

(a)

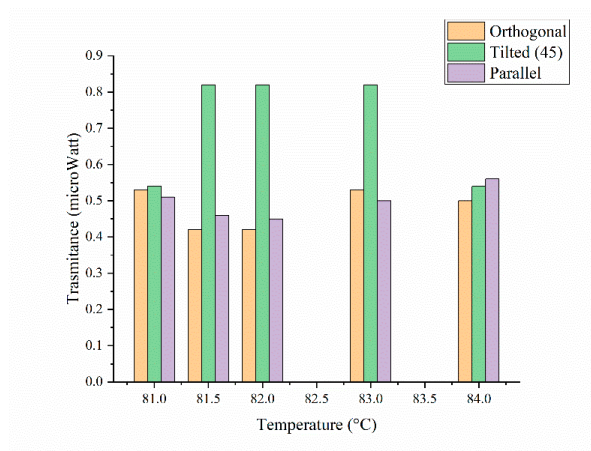

(b)

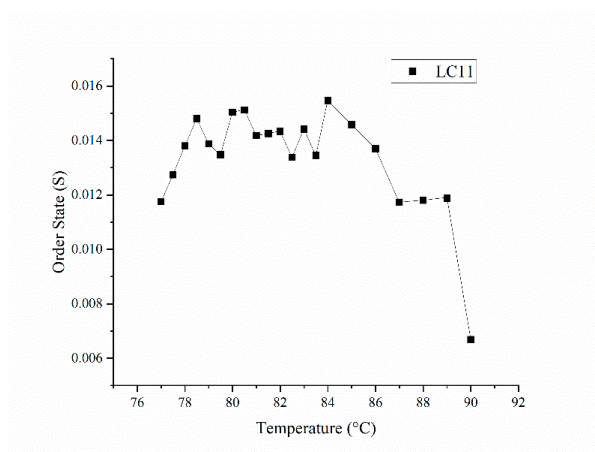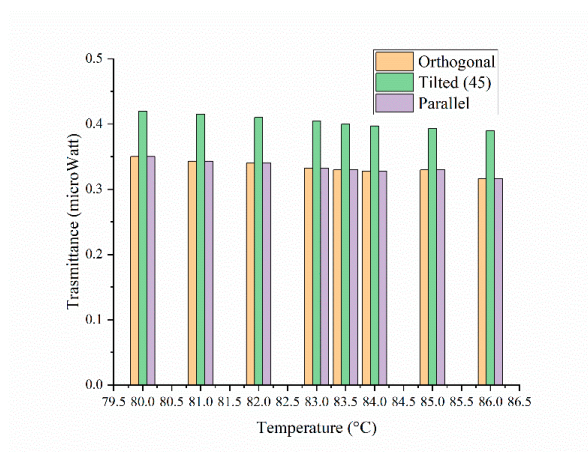

(c)

(d)

**Figure S2.** (a) Order State of LC81, (b) Transmittance of LC81 between crossed polarizers (c) Order state of LC11, (d) Transmittance of LC11 between crossed polarizers.

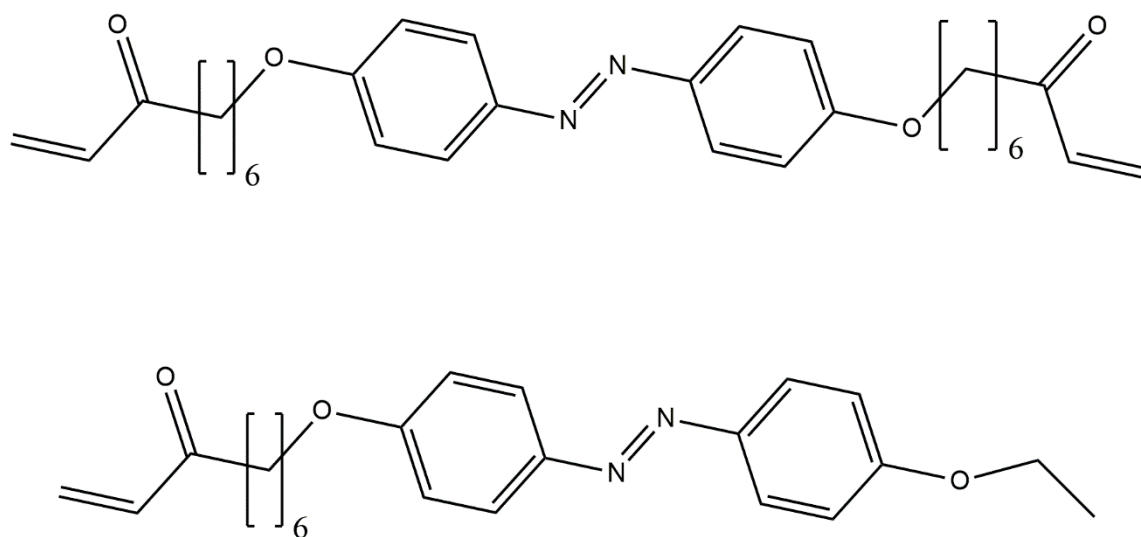

**Figure S3;-** Here are depicted the LC monomers used in this work. The monomers are mixed in two different molar ratios (8:1 1:1 1:8). Up) monomer A6zA6 down) monomer A6z2
